# Supplementary material
Source: PubMed Central journal article supplement (PMC1617151)

# ELECTRONIC APPENDIX

This is the Electronic Appendix to the article  
**Avian collision risk at an offshore wind farm**

by

Mark Desholm & Johnny Kahlert

*Biol. Lett.* ([doi:10.1098/rsbl.2005.0336](https://doi.org/10.1098/rsbl.2005.0336))

Electronic appendices are refereed with the text; however, no attempt is made to impose a uniform editorial style on the electronic appendices.

Figure 3

Transects used for calculating the proportion of waterbirds entering the wind farm. Letters relate to the symbols used in the text: A equals the red, B the blue, C the green, and D the orange transect. Black lines indicate westerly migrating flocks of waterbirds, red dots the wind turbines, blue dot the radar, and the scale bar equals 3000m.

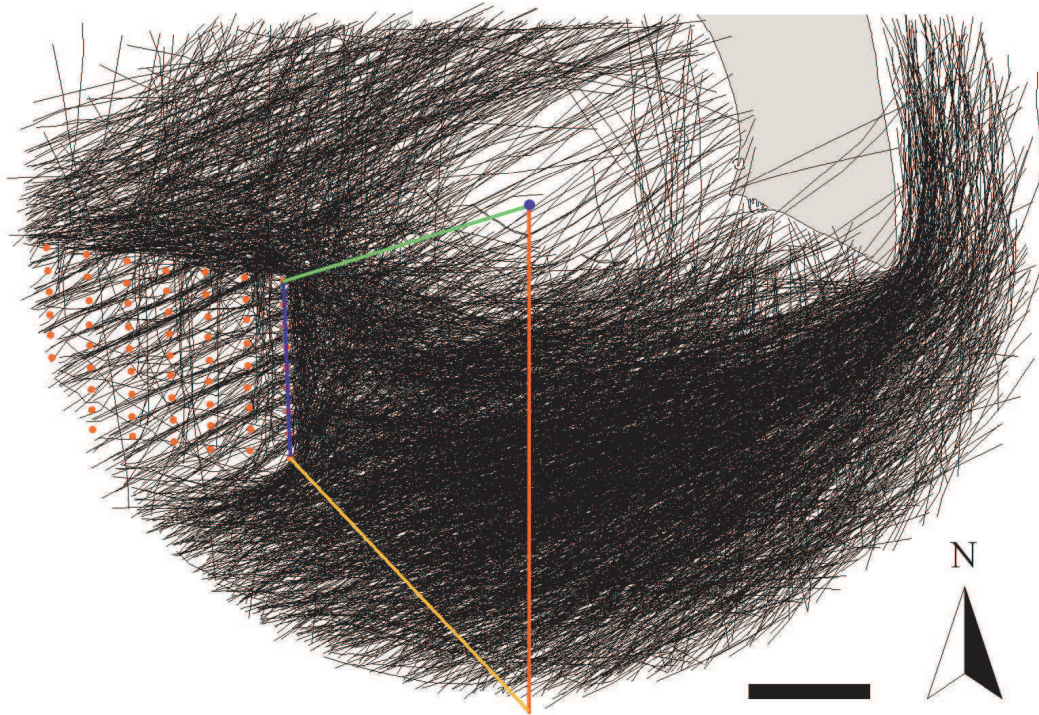

Supplement: rsbl20050336s04.pdf [file rsbl20050336s04.pdf]
